# Supplementary material
Source: publisher figshare collection journal article supplement (https://geolsoc.figshare.com/ndownloader/files/5423084)
Supplement: Supplementary file 1 [file 5423084]

	ISOTOPIC RATIOS							AGES Ma
Analysis	207Pb/235U	1s abs	206Pb/238U	1s abs	Rho	207Pb/206Pb	1s abs	207Pb/235U	1s abs	206Pb/238U	1s abs	207Pb/206Pb	1s abs	concordia	1s abs	MSWD	probab. conc.
#1	6.6061	0.4793	0.3959	0.0195	0.34	0.1233	0.0052	2060	64	2150	90	2004	75	2082	59	3.89	0.049
#2	5.8932	0.2350	0.3550	0.0153	0.54	0.1212	0.0016	1960	35	1958	73	1973	24	1960	35	0.00	0.954
#3	6.1384	0.2222	0.3545	0.0104	0.41	0.1268	0.0033	1996	32	1956	50	2054	46	1989	31	2.89	0.089
#4	18.0363	1.0600	0.6046	0.0295	0.41	0.2209	0.0048	2992	57	3048	118	2987	35	2994	56	1.10	0.295
#5	5.4166	0.2605	0.3467	0.0171	0.51	0.1157	0.0027	1887	41	1919	82	1891	41	1887	41	0.80	0.372
#6	4.7573	0.3630	0.3229	0.0229	0.46	0.1067	0.0029	1777	64	1804	112	1743	49	1779	63	0.28	0.594
#7	4.8168	0.1842	0.3333	0.0101	0.40	0.1069	0.0022	1788	32	1854	49	1747	37	1800	31	8.07	0.005
#8	4.7315	0.2106	0.3276	0.0123	0.42	0.1046	0.0027	1773	37	1827	60	1707	47	1780	36	3.78	0.052
#9	0.3526	0.0635	0.0565	0.0021	0.10	0.0471	0.0063	307	48	354	13	57	321	352	13	4.11	0.043
#10	0.4195	0.0371	0.0572	0.0031	0.30	0.0547	0.0031	356	27	359	19	399	125	358	17	0.04	0.833
#11	5.2112	0.4326	0.3285	0.0221	0.41	0.1159	0.0032	1854	71	1831	107	1894	50	1850	68	0.21	0.644
#12	5.8490	0.2706	0.3447	0.0121	0.38	0.1211	0.0040	1954	40	1909	58	1973	60	1943	38	2.47	0.116
#13	4.8573	0.1774	0.3222	0.0132	0.56	0.1105	0.0034	1795	31	1800	64	1807	56	1795	31	0.04	0.838
#14	6.0209	0.3955	0.3730	0.0193	0.39	0.1207	0.0033	1979	57	2044	91	1967	48	1989	55	2.25	0.133
#15	8.8670	0.4032	0.4365	0.0118	0.30	0.1519	0.0051	2324	41	2335	53	2367	57	2328	37	0.14	0.707
#16	4.5029	0.3577	0.3171	0.0204	0.41	0.1043	0.0033	1732	66	1776	100	1702	59	1739	63	0.86	0.354
#17	4.9791	0.1487	0.3296	0.0102	0.52	0.1102	0.0025	1816	25	1837	50	1803	41	1816	25	0.96	0.326
#18	6.0498	0.2179	0.3647	0.0100	0.38	0.1210	0.0037	1983	31	2005	47	1971	55	1987	30	0.89	0.345
#19	0.4017	0.0383	0.0583	0.0039	0.35	0.0494	0.0027	343	28	365	24	165	128	356	21	2.29	0.131
#20	13.4864	0.4415	0.5262	0.0095	0.28	0.1870	0.0043	2714	31	2725	40	2716	38	2718	27	0.26	0.612
#21	6.3026	0.2942	0.3732	0.0160	0.46	0.1243	0.0028	2019	41	2045	75	2019	41	2020	41	0.59	0.442
#22	4.6377	0.2411	0.3242	0.0124	0.37	0.1059	0.0029	1756	43	1810	60	1730	50	1769	40	3.26	0.071
#23	5.9299	0.4169	0.3443	0.0224	0.46	0.1230	0.0029	1966	61	1907	108	2001	42	1961	61	1.48	0.223
#24	6.3961	0.2316	0.3757	0.0155	0.57	0.1220	0.0027	2032	32	2056	73	1985	40	2030	31	0.64	0.425
#25	6.5364	0.3202	0.3825	0.0156	0.42	0.1243	0.0028	2051	43	2088	73	2019	39	2055	42	1.22	0.270
#26	6.5073	0.2419	0.3832	0.0115	0.40	0.1263	0.0029	2047	33	2091	53	2046	40	2053	32	3.13	0.077
#27	6.7017	0.2582	0.3915	0.0120	0.40	0.1248	0.0024	2073	34	2130	56	2026	34	2081	33	4.69	0.030
#28	6.2121	0.2771	0.3676	0.0155	0.47	0.1231	0.0035	2006	39	2018	73	2001	50	2007	39	0.13	0.717
#29	5.0511	0.2688	0.3194	0.0140	0.41	0.1164	0.0024	1828	45	1787	68	1902	38	1820	44	1.62	0.203
#30	4.6812	0.2149	0.3175	0.0109	0.38	0.1066	0.0032	1764	38	1777	54	1743	55	1767	36	0.26	0.612
#31	0.7827	0.0466	0.0991	0.0041	0.35	0.0568	0.0022	587	27	609	24	485	87	599	21	2.29	0.130
#32	6.1084	0.2528	0.3666	0.0142	0.47	0.1242	0.0021	1991	36	2013	67	2018	30	1992	36	0.54	0.463
#33	3.3229	0.1520	0.2516	0.0122	0.53	0.1016	0.0068	1486	36	1447	63	1654	124	1485	36	2.21	0.137
#34	5.6387	0.2816	0.3472	0.0134	0.39	0.1210	0.0030	1922	43	1921	64	1971	45	1922	41	0.00	0.983
#35	5.0542	0.1726	0.3297	0.0096	0.42	0.1092	0.0034	1828	29	1837	46	1786	56	1830	28	0.15	0.695
#36	4.6751	0.1532	0.3232	0.0089	0.42	0.1046	0.0027	1763	27	1805	43	1707	48	1769	27	4.46	0.035
#37	4.5233	0.1329	0.3161	0.0086	0.46	0.1042	0.0034	1735	24	1770	42	1699	61	1738	24	3.46	0.063
#38	2.6623	0.1256	0.2311	0.0086	0.39	0.0842	0.0020	1318	35	1340	45	1297	45	1325	32	1.00	0.318
#39	6.4521	0.2772	0.3748	0.0166	0.52	0.1232	0.0032	2039	38	2052	78	2003	47	2039	38	0.15	0.702
#40	5.8831	0.2860	0.3576	0.0154	0.44	0.1202	0.0034	1959	42	1971	73	1960	50	1960	42	0.13	0.722
#41	5.5227	0.2947	0.3354	0.0161	0.45	0.1165	0.0041	1904	46	1864	78	1903	63	1900	45	1.29	0.257
#42	5.5399	0.3270	0.3457	0.0141	0.35	0.1175	0.0040	1907	51	1914	67	1918	61	1909	47	0.05	0.830
#43	6.7861	0.2442	0.3872	0.0130	0.47	0.1283	0.0023	2084	32	2110	60	2075	32	2085	32	0.93	0.336
#44	6.2720	0.3326	0.3689	0.0215	0.55	0.1199	0.0043	2015	46	2024	101	1955	63	2014	46	0.05	0.818
#45	3.6093	0.1693	0.2777	0.0111	0.43	0.0927	0.0023	1552	37	1580	56	1481	48	1557	36	1.14	0.286
#46	12.2744	0.3655	0.5046	0.0116	0.39	0.1816	0.0038	2626	28	2634	50	2667	34	2627	27	0.12	0.734
#47	0.6421	0.0300	0.0802	0.0028	0.37	0.0582	0.0025	504	19	497	17	538	92	500	15	0.41	0.524
#48	5.3110	0.3133	0.3370	0.0150	0.38	0.1160	0.0023	1871	50	1872	72	1895	36	1871	48	0.00	0.963
#49	4.6614	0.2364	0.3120	0.0145	0.46	0.1092	0.0024	1760	42	1750	71	1786	41	1759	42	0.10	0.755
#50	6.5910	0.2291	0.3798	0.0111	0.42	0.1274	0.0022	2058	31	2076	52	2063	31	2060	30	0.53	0.467
#51	4.8398	0.2077	0.3252	0.0117	0.42	0.1087	0.0028	1792	36	1815	57	1778	46	1795	35	0.77	0.380
#52	6.7710	0.1812	0.3910	0.0085	0.40	0.1271	0.0022	2082	24	2127	39	2059	31	2088	23	6.13	0.013
#53	4.5327	0.4409	0.2858	0.0230	0.41	0.1152	0.0035	1737	81	1621	115	1884	55	1708	79	4.49	0.034
#54	5.7847	0.4284	0.3671	0.0167	0.31	0.1150	0.0049	1944	64	2016	79	1880	76	1968	56	2.84	0.092
#55	6.4733	0.3391	0.3740	0.0185	0.47	0.1262	0.0025	2042	46	2048	87	2046	35	2043	46	0.03	0.874
#56	5.8810	0.3578	0.3495	0.0224	0.53	0.1198	0.0030	1958	53	1932	107	1953	45	1959	53	0.33	0.563
#57	7.3656	0.2125	0.4030	0.0120	0.52	0.1343	0.0031	2157	26	2183	55	2155	41	2156	26	1.23	0.268
#58	0.4265	0.0441	0.0608	0.0038	0.30	0.0516	0.0027	361	31	381	23	266	118	375	21	1.48	0.224
#59	3.3231	0.3261	0.2669	0.0214	0.41	0.0886	0.0026	1486	77	1525	109	1396	57	1495	72	0.55	0.459
#60	4.8311	0.1799	0.3295	0.0088	0.36	0.1076	0.0029	1790	31	1836	43	1759	49	1802	29	4.54	0.033
#61	13.3906	0.3438	0.5293	0.0131	0.48	0.1818	0.0034	2708	24	2738	55	2670	31	2707	24	1.59	0.207
#62	5.7991	0.3901	0.3558	0.0200	0.42	0.1195	0.0025	1946	58	1962	95	1949	37	1948	57	0.13	0.714
#63	0.4168	0.0497	0.0576	0.0044	0.32	0.0535	0.0040	354	36	361	27	350	167	359	24	0.16	0.686
#64	6.1359	0.4353	0.3645	0.0243	0.47	0.1207	0.0024	1995	62	2003	115	1967	35	1996	62	0.03	0.873
#65	16.3737	0.6132	0.5708	0.0193	0.45	0.2070	0.0053	2899	36	2911	79	2882	41	2899	36	0.12	0.734
#66	6.0581	0.3051	0.3530	0.0167	0.47	0.1252	0.0032	1984	44	1949	80	2031	45	1982	44	1.00	0.318
#67	4.9116	0.1857	0.3187	0.0091	0.38	0.1097	0.0018	1804	32	1783	44	1794	30	1799	30	0.93	0.335
#68	4.7461	0.1335	0.3189	0.0062	0.34	0.1075	0.0023	1775	24	1785	30	1758	39	1778	21	0.34	0.560
#69	6.7232	0.3508	0.3802	0.0189	0.48	0.1314	0.0037	2076	46	2077	88	2117	50	2076	46	0.00	0.972
#70	7.4535	0.3842	0.3828	0.0255	0.65	0.1399	0.0039	2167	46	2089	119	2226	48	2179	43	2.70	0.100
#71	7.6221	0.4808	0.4048	0.0185	0.36	0.1347	0.0040	2187	57	2191	85	2160	52	2188	54	0.01	0.928
